# Supplementary material for: A bimetallic MOF@graphene oxide composite as an efficient bifunctional oxygen electrocatalyst for rechargeable Zn–air batteries
Source: Royal Society of Chemistry journal article supplement (doi:10.1039/d0dt00976h), 2020-01-01
Supplement: d0dt00976h1.pdf [file d0dt00976h1.pdf]

## Electronic Supplementary Material (ESI)

### Bimetallic MOFs@Graphene Oxide Composites as Efficient Bifunctional Oxygen Electrocatalysts in Rechargeable Zn-Air Batteries

Yao Xiao<sup>a,b</sup>, Beibei Guo<sup>b</sup>, Jing Zhang<sup>c</sup>, Chun Hu<sup>b</sup>, Ruguang Ma<sup>b</sup>, Deyi Wang<sup>a,c\*</sup>, Jiacheng Wang<sup>b\*\*</sup>

<sup>a</sup> School of Science, Xihua University, Chengdu, 610039, China

<sup>b</sup> State Key Laboratory of High Performance Ceramics and Superfine Microstructure, Shanghai Institute of Ceramics, Chinese Academy of Sciences, Shanghai 200050, China.

<sup>c</sup> IMDEA Materials Institute, C/Eric Kandel, 2, Getafe, Madrid, 28906, Spain

Emails: jiacheng.wang@mail.sic.ac.cn; deyi.wang@imdea.org

## Experimental Section

### Chemicals

Cobalt nitrate hexahydrate ( $\text{Co}(\text{NO}_3)_2 \cdot 6\text{H}_2\text{O}$ ), zinc nitrate hexahydrate ( $\text{Zn}(\text{NO}_3)_2 \cdot 6\text{H}_2\text{O}$ ) and 2-methylimidazole were purchased from Sinopharm Chemical Reagent Co. Ltd. Methanol ( $\text{CH}_3\text{OH}$ ) was purchased Shanghai Lingfeng Chemical Reagent Co. Ltd. Nafion solution (5 wt%) was purchased from Aldrich. The commercial Pt/C catalyst (20 wt%) was obtained from Johnson Matthey (UK). All solvents and chemicals were utilized as received without any further purification.

## **Preparation of MOF@GO nano-hybrid**

GO was prepared by a Hummers' method.<sup>1</sup> ZnCo-ZIF@GO nano-hybrid was prepared typically as following. Briefly, 0.864 g  $\text{Zn}(\text{NO}_3)_2 \cdot 6\text{H}_2\text{O}$  and 0.576 g  $\text{Co}(\text{NO}_3)_2 \cdot 6\text{H}_2\text{O}$  were dissolved in 100 mL methanol (mole ratio Zn/Co=6/4). Then, 120 mg GO water solution was added into mixed metal ion solution with sonication, followed by stirring for 30 mins. Meanwhile, 2.16 g 2-MIM was dissolved in 100 mL methanol separately. Afterwards, two solutions were mixed rapidly with vigorously stirring for 2 h at 25 °C. The generated purple precipitates were collected and cleaned by centrifuge at 10000 rpm. The residue precursors were removed by repeating this procedure. The sample was dried in the vacuum oven at 80 °C overnight.<sup>2</sup> ZnCo-ZIF was also prepared by the same procedure without adding GO.

## **Characterizations**

Field emission scanning electron microscopy (FESEM) was performed on FEI Magellan 400, and Transmission electron microscopy (TEM) images were collected on a JEM-2100F. Power X-ray diffraction (XRD) was obtained using a D8 ADVANCE instrument with Cu K $\alpha$  radiation (40 kV, 60 mA). Raman spectroscopy was measured on a DXR Raman Microscope (Thermal Scientific Co., USA) with 532 nm excitation length. X-ray photoelectron spectroscopy (XPS) were recorded using an ESCALAB 250 X-ray photoelectron spectrometer using Al K $\alpha$  ( $h\nu=1486.6$  eV) radiation.  $\text{N}_2$  adsorption-desorption isotherms were measured at -196 °C with an ASAP 2010 Surface Area and Pore Size Analyzer System (Micromeritics, Norcross, GA). The special surface area was calculated using the multipoint Brunauer–Emmett–Teller (BET). The

pore size distribution curves, pore volume and pore diameter were carried out by the adsorption branch of the isotherms using the Density- Functional- Theory (DFT).

### **Electrocatalytic activity evaluation**

All electrochemical measurements were conducted in a three-electrode configuration using a CHI760E electrochemical workstation at room temperature (25 °C). A glassy carbon electrode with a loading mass of 0.6 mg cm<sup>-2</sup> was used as working electrode. The saturated Hg/HgCl<sub>2</sub> electrode (SCE) and graphite rod were selected as the reference and counter electrodes, respectively. To prepare the working electrode, 5 mg catalyst and 1 mg acetylene black were dispersed in an aqueous solution containing 250 μL deionized water, 250 μL ethanol and 20 μL 5% Nafion solution. The obtained homogeneous catalyst ink (10 μL) was pipetted onto a polished glassy carbon electrode. The electrochemical measurement was conducted in O<sub>2</sub>-saturated 0.1 M KOH for ORR and 1 M KOH for OER, respectively. The potential, measured against a Hg/HgCl<sub>2</sub> electrode, was converted to potential versus RHE according to  $E_{\text{RHE}} = 0.2415 + E_{\text{SCE}} + \text{pH} \cdot 0.059$ . Linear sweep voltammetry (LSV) measurements were executed at a scan rate of 10 mV s<sup>-1</sup>. The polarization curves of the ORR process were measured from 0 to 1.2 V (vs. RHE) in O<sub>2</sub>-saturated solution with a sweep rate of 10 mV s<sup>-1</sup> at different rotating speeds. The numbers of electrons transferred (n) during ORR was calculated by the following Koutecky-Levich equation at various electrode potentials based on the different rotating speeds:

$$\frac{1}{j} = \frac{1}{j_k} + \frac{1}{j_L} = \frac{1}{j_k} + \frac{1}{B\omega^2} \quad (1)$$

$$B = 0.2nFC_0D_0^{2/3}\nu^{-1/6} \quad (2)$$

where  $j$  is the measured current density,  $j_k$  and  $j_L$  are the kinetic and diffusion-limiting current densities,  $\omega$  is the angular velocity,  $n$  is transferred electron number,  $F$  is the Faraday constant (96485 C mol<sup>-1</sup>),  $C_0$  is the bulk concentration of O<sub>2</sub> (1.2×10<sup>-6</sup> mol cm<sup>-3</sup> for 0.1 M KOH),  $D_0$  is the diffusion coefficient of O<sub>2</sub> (1.9×10<sup>-5</sup> cm<sup>2</sup> s<sup>-1</sup> in 0.1 M KOH), and  $\nu$  is the kinematic viscosity of the electrolyte (0.01 cm<sup>2</sup> s<sup>-1</sup> in 0.1 M KOH). For the RRDE test, a GC disk (0.2475cm<sup>2</sup>) surrounded by a Pt ring (0.1861cm<sup>2</sup>) was chosen to load catalysts as working electrode. The current was collected in O<sub>2</sub>-saturated 0.1 M KOH from GC disk and Pt ring, respectively. The electrons transferred number ( $n$ ) and the hydrogen peroxide percentage (%H<sub>2</sub>O<sub>2</sub>) during the ORR process are calculated as follows:

$$n = 4 \frac{I_d}{I_d + I_r/N} \quad (3)$$

$$\%H_2O_2 = 200 \frac{I_r/N}{I_r/N + I_d} \quad (4)$$

where  $I_d$  is the disk current,  $I_r$  is the ring current and  $N$  (the value is 0.37) is the collection efficiency of the Pt ring electrode.

### **Assembly of a zinc–air battery (ZAB)**

For the Zn-air battery test, the as-prepared catalyst ink was uniformly coated onto carbon paper as the air electrode. A polished Zn plate with a thickness of 0.5 mm was used as the anode and 6 M KOH solution containing 0.2 M Zn(AC)<sub>2</sub> as the electrolyte. The mass loading was 0.62 mg cm<sup>-2</sup>. For comparison, a mixture of 40% Pt/C and RuO<sub>2</sub> (mass ratio of 1:1) with the same loading was coated onto carbon paper

and used as the cathode. The electrochemical performances of Zn-air batteries, such as charge/discharge performance and cycling ability, were recorded by Land CT2001A system.

### Supplementary figures:

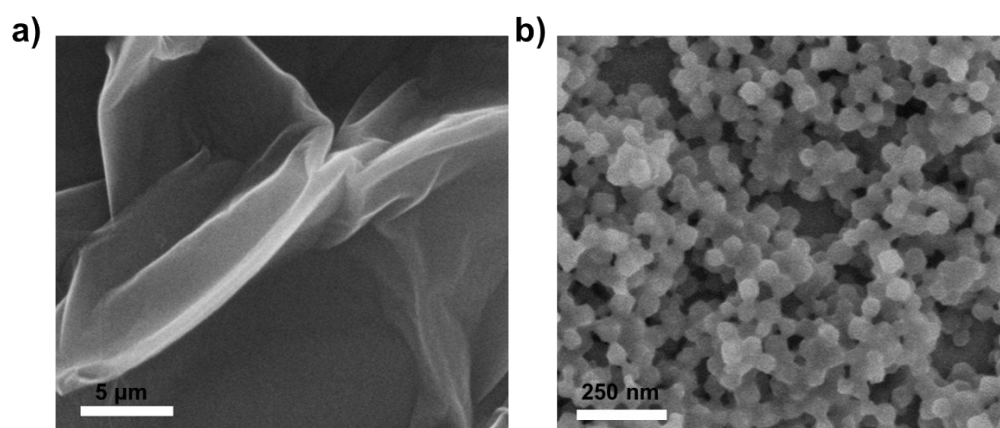

**Fig. S1** SEM image of GO (a) and ZnCo-ZIF (b)

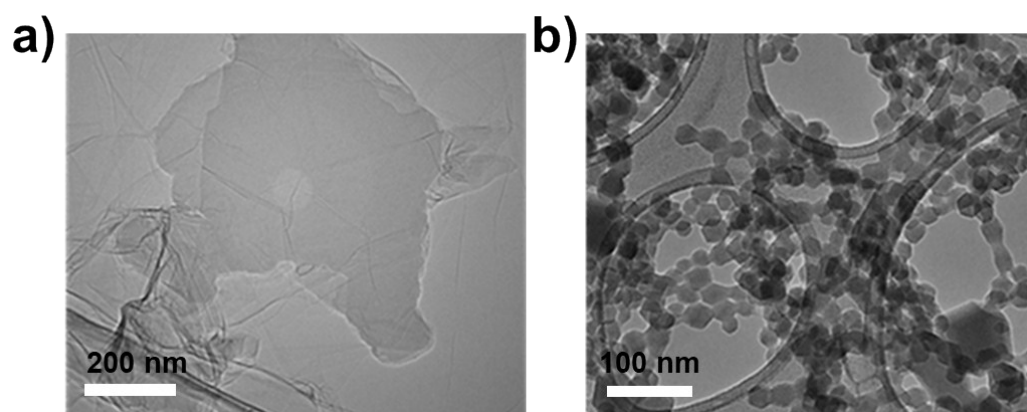

**Fig. S2** TEM image of (a) GO and (b) ZnCo-ZIF

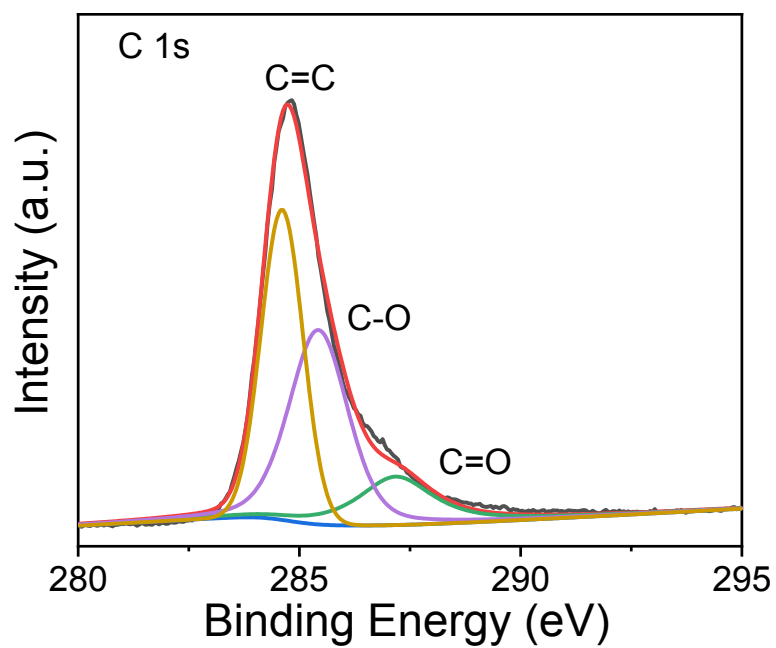

**Fig. S3** High-resolution XPS spectra of C 1s fitting in ZnCo-ZIF@GO.

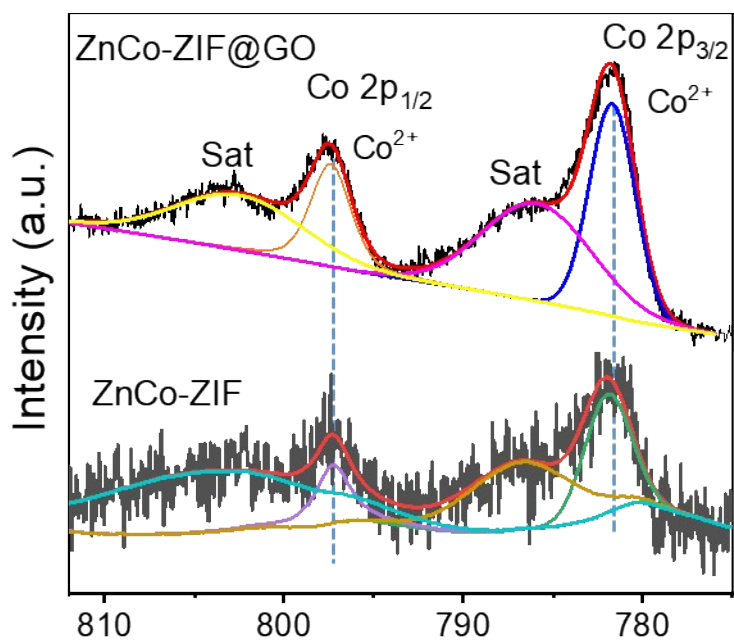

**Fig. S4** High-resolution XPS spectra of Co 2p fitting in ZnCo-ZIF@GO and ZnCo-ZIF.

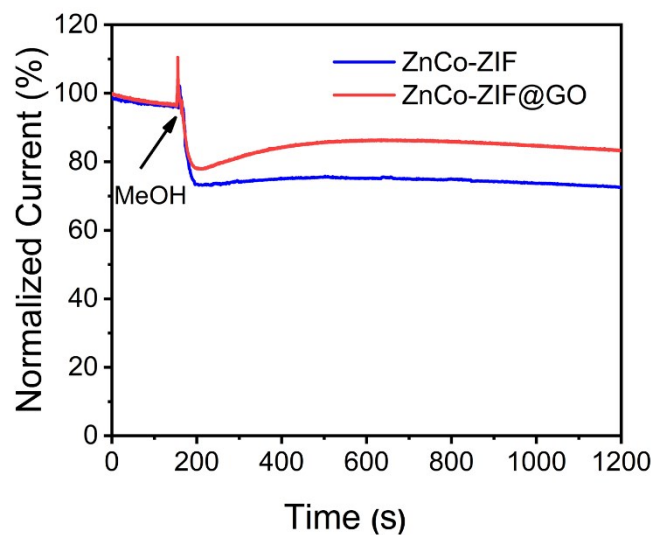

**Fig. S5** Tolerance toward methanol test for ZnCo-ZIF and ZnCo-ZIF@GO

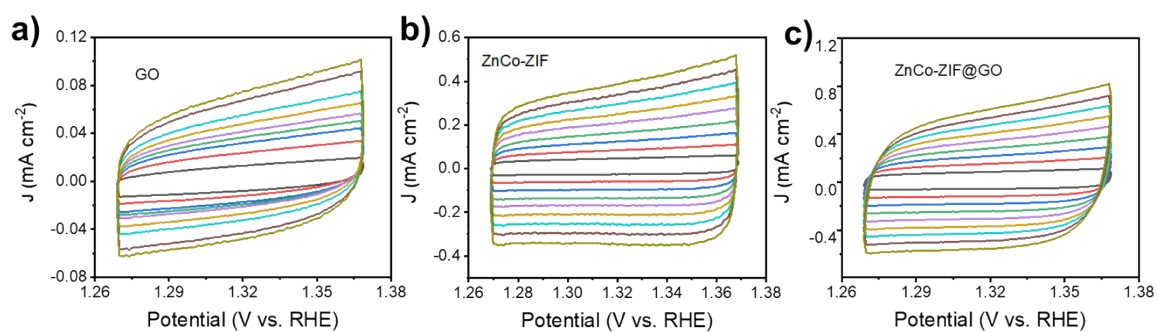

**Fig. S6** cyclic voltammetry (CV) curves in the potential range of 1.27–1.37 V at different scan rates.

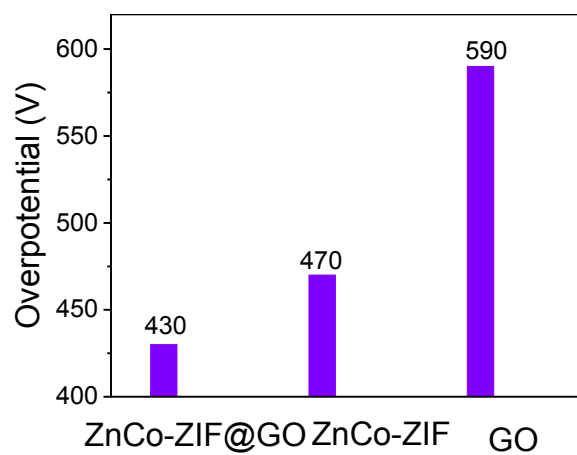

**Fig. S7** Overpotential values of ZnCo-ZIF, GO and ZnCo-ZIF@GO

## Supplementary Table:

**Table S1** Summary on the surface areas, total pore volumes, and pore sizes of ZnCo-ZIF and ZnCo-ZIF@GO.

| Sample      | $S_{\text{BET}}$ ( $\text{m}^2\cdot\text{g}^{-1}$ ) | $V_{\text{pore}}$ ( $\text{cm}^3\text{g}^{-1}$ ) | Pore size (nm) |
|-------------|-----------------------------------------------------|--------------------------------------------------|----------------|
| ZnCo-ZIF    | 1179                                                | 0.623                                            | 0.926          |
| ZnCo-ZIF@GO | 338.2                                               | 0.424                                            | 1.02           |

**Table S2** Summary of recently reported catalytic performances of non-precious metal based bifunctional oxygen electrodes in 0.1 M KOH and 1 M KOH, which indicates the potential difference between ORR half-wave-potential and OER potential at  $10 \text{ mAcm}^{-2}$

| Catalysts                                                        | ORR onset potential (V vs. RHE) | ORR half-wave potential (V vs. RHE) | OER potential at $10 \text{ mAcm}^{-2}$ (V vs. RHE) | Refs      |
|------------------------------------------------------------------|---------------------------------|-------------------------------------|-----------------------------------------------------|-----------|
| ZnCo-ZIF@GO                                                      | 0.89                            | 0.76                                | 1.66                                                | This work |
| ZnCo-ZIF                                                         | 0.76                            | 0.57                                | 1.70                                                | This work |
| GO                                                               | 0.82                            | 0.71                                | 1.82                                                | This work |
| NiCo <sub>2</sub> S <sub>4</sub> @N/S-rGO                        | 0.89                            | 0.76                                | 1.70                                                | 3         |
| CaMnO <sub>3</sub>                                               | 0.89                            | 0.76                                | 1.77                                                | 4         |
| Co <sub>3</sub> O <sub>4</sub> /Co <sub>2</sub> MnO <sub>4</sub> | 0.85                            | 0.68                                | 1.77                                                | 5         |
| LNO-NR/rGO                                                       | 0.83                            | 0.63                                | 1.75                                                | 6         |
| $\epsilon$ -MnO <sub>2</sub> /MOF(Fe)                            | 0.84                            | 0.64                                | -                                                   | 7         |
| Co@Co <sub>3</sub> O <sub>4</sub> /NC-2                          | 0.85                            | 0.74                                | 1.64                                                | 8         |
| NiCo <sub>2</sub> O <sub>4</sub>                                 | 0.84                            | 0.72                                | 1.64                                                | 9         |
| LaNiO <sub>3</sub> /N-C                                          | -                               | 0.69                                | 1.63                                                | 10        |

## References

1. T. Zhou, W. Xu, N. Zhang, Z. Du, C. Zhong, W. Yan, H. Ju, W. Chu, H. Jiang, C. Wu and Y. Xie, *Adv. Mater.*, 2019, **31**, e1807468.
2. J. Zhang, Z. Li, L. Zhang, J. García Molleja and D.-Y. Wang, *Carbon*, 2019, **153**, 407-416.
3. Q. Liu, J. Jin and J. Zhang *ACS Appl. Mater. Interfaces*, 2013, **5**, 5002-5008.
4. X. Han, F. Cheng, T. Zhang, J. Yang, Y. Hu and J. Chen, *Adv. Mater.*, 2014, **26**, 2047-2051.
5. D. Wang, X. Chen, D. G. Evans and W. Yang, *Nanoscale*, 2013, **5**, 5312-5315.
6. J. Hu, Q. Liu, Z. Shi, L. Zhang and H. Huang, *Rsc Adv*, 2016, **6**, 86386-86394.



7. H. Wang, F. Yin, B. Chen and G. Li, *J. Mater. Chem. A*, 2015, **3**, 16168-16176.
8. A. Aijaz, J. Masa, C. Rosler, W. Xia, P. Weide, A. J. Botz, R. A. Fischer, W. Schuhmann and M. Muhler, *Angew. Chem., Int. Ed.*, 2016, **55**, 4087-4091.
9. M. Prabu, K. Ketpang and S. Shanmugam, *Nanoscale*, 2014, **6**, 3173-3181.
10. W. G. Hardin, D. A. Slanac, X. Wang, S. Dai, K. P. Johnston and K. J. Stevenson, *J. Phys. Chem. Lett*, 2013, **4**, 1254-1259.
